# Supplementary material
Source: PubMed Central journal article supplement (PMC3558595)
Supplement: NIHMS428516-supplement-ESI.pdf [file NIHMS428516-supplement-ESI.pdf]

# Determination of the Quaternary Structure of a Bacterial ATP-Binding Cassette (ABC) Transporter in Living Cells

Deo R. Singh,<sup>†a</sup> Mohammad M. Mohammad<sup>†b</sup>, Suparna Patowary<sup>a</sup>, Michael R. Stoneman<sup>‡a</sup>, Julie A. Oliver<sup>c</sup>, Liviu Movileanu<sup>d</sup> and Valerică Raicu<sup>\*e</sup>

## SUPPLEMENTAL INFORMATION

```

P. aeruginosa      -----MGQIRVSGLGKAYKQYPNRWSRLFEWLVFPSPRRHHLHWILREVEFTIEPGE 52
E. coliO8         -----MSYIRVNVVNGKAYRQYHSKTGRLEIWLSPLNTRHNLKWLSDINFEVAPGE 52
E. coliO9a       -----MSIKVQHVGKAYKYYPKWNRVIEKLLPGDKPRHSSKWWLKDINFSIEPGE 51
K. pneumoniaeO1  ---MHPVINFSHVTKKEYPLYHHIGSGIKDLIFHPKRAFQLLKGKRYLAIEDVSFTVGKGE 57
K. pneumoniaeO8  ---MEPVINFSNVTKKEYPLYHHIGSGIKDLVFPKRAFQLLKGKRYLAIEDISFTVAKGE 57
A. salmonicida   -----MSEPVLAVSGVKNKSFPIYRSPWQALWHALNPKADVQVQALRDIETVYRGE 52
Y. enterocoliticaO_3  MTSLIFKNVTMSYPIYNAHSQSLRNQLVVRVSTGGRIGGSRGEVVTVTALDNISFELNSGD 60
E. coliK1        -----MIKIENLTKSYRTPPTGRHYVFKNLNIIIFPKGY 32
E. coliK5        -----MIKIENLTKSYRTPPTGRHYVFKDLNIEIPSGK 32
: : : : : *

```

### Walker A

```

P. aeruginosa      AVGIIVGVNGAGKSTLLKMIAGTTQPTCGEIRVAGRVAALLELGMGFHPDFTGRQNVFMAG 112
E. coliO8         AVGIIVGVNGAGKSTLLKLTGTSTRPPTGEIEISGRVAALLELGMGFHSDFTGRQNVYMSG 112
E. coliO9a       AVGIIVGVNGAGKSTLLKLLTGTTPQTKGSIEIQGRVAALLELGMGFHPDFTGRQNVYMSG 111
K. pneumoniaeO1  AVALIGRNGAGKSTSLGLVAGVIKPTKGTVTTEGRVASMELGGGFHPPELTGRENIYLNA 117
K. pneumoniaeO8  AVALIGRNGAGKSTSLGLVAGVIKPTKGSVTTTHGRVASMELGGGFHPPELTGRENIYLNA 117
A. salmonicida   TIGIVGHNGAGKSTLLQLITGVMQPDGQITRTGRVVGLELGGGFNPEFTGRENIFFNG 112
Y. enterocoliticaO_3  SVGLIGHNGAGKSTLLRMTMAGIYPASSGEIIREGSVATVFELGAGMDPELGSYENIMRML 120
E. coliK1        NIALIGQNGAGKSTLLRIIGGIDRDPDSGNIITEHKISWPVGLAGGFQGSALTGRENVKFVA 92
E. coliK5        SVAFIGRNGAGKSTLLRMIGGIDRDPDSGKIITNKTISWPVGLAGGFQGSALTGRENVKFVA 92
: : : * * * * * * : * . * : : . * . * : : * * :

```

### Signature

### Walker B

```

P. aeruginosa      QLLGMQVEEIQALMPDIEAFAEIGEAEIEQPVRTYSSGMQMLAFSVATARRPDILIVDEA 172
E. coliO8         QLLGLSSEKITELMPQIEEFAEIGDYIDQPVRYSSGMQVRLAFSVATAIRPDVLIIDEA 172
E. coliO9a       LMMGLGREEIERLMPDIEAFAEIDIGDYIEFPVRIYSSGMQMLAFAVATASRPDILIVDEA 171
K. pneumoniaeO1  TLLGLRRKEVQQRMERIEEFSELGEFIDEPIRVYSSGMLAKLGFVSIQVPEPDLIIDEV 177
K. pneumoniaeO8  TLLGLRRKEVQQRMERIEEFSELGEFIDEPIRVYSSGMLAKLGFVSIQVPEPDLIIDEV 177
A. salmonicida   AILGMSQREMDRLERILSFAAIGDFIDQPVKNYSSGMMVRLAFSVIINTDPDVLIIIDEA 172
Y. enterocoliticaO_3  LLLGNSVASAKSKIPEIEEFCELGDFLVLPVRTYSSGMTMLMFVAVATSMRPEILLIDEM 180
E. coliK1        RLYAK-RDELNERVDFVEESELGKYFDMPIKTYSSGMRSRLAFGLSMAFKFDYYLIDEI 151
E. coliK5        RLYAK-QEELKEKIEFVEEFAELGKYFDMPIKTYSSGMRSRLGFLSMAFKFDYYIVDEV 151
: . . : : * . * : * : * * * * * * * * : : * *

```

<sup>a</sup> Physics Department, University of Wisconsin-Milwaukee, Milwaukee, WI 53211, USA

<sup>b</sup> Department of Physics, Syracuse University, Syracuse, NY 13244, USA

<sup>c</sup> Department of Biological Sciences, University of Wisconsin-Milwaukee, Milwaukee, WI 53211, USA

<sup>d</sup> Department of Physics, the Structural Biology, Biochemistry, and Biophysics Program and the Syracuse Biomaterials Institute, Syracuse University, Syracuse, NY 13244, USA

<sup>e</sup> Physics Department and the Department of Biological Sciences, University of Wisconsin-Milwaukee, P.O. Box 413, Milwaukee, WI 53201-0413, USA. E-mail: [vracu@uwm.edu](mailto:vracu@uwm.edu); Tel.: 414-229-4969; Fax: 414-229-5589

<sup>†</sup>Equally contributed to this work

<sup>‡</sup>Current address: Aurora Spectral Technologies, Bayside, Wisconsin 53217, USA

|                      | <u>D-loop</u>                                                   | <u>H-loop</u> |     |
|----------------------|-----------------------------------------------------------------|---------------|-----|
| P. aeruginosa        | LSVGDAYFQHKSFERIRSRFRKAGTTLTLLIVSHDRSAIQSICDSAILLEQGRMAMRGRPEEV |               | 232 |
| E. coliO8            | LSVGDAYFQHKSFERIRKFRQEGTTLTLLVSHDKQAIQSI CDRAILLNKGQIEMEGEPEAV  |               | 232 |
| E. coliO9a           | LSVGDSTRFQAKCYARIADFKEQGTTLTLLVSHSAGDIVKHCDRAIFLNKNGDICMDGTARDV |               | 231 |
| K. pneumoniaeO1      | LAVGDIAFQAKCIQTIRDFKRRGVTILFVSHNMSDVEKICDRVIWIENHRLREVGSAERI    |               | 237 |
| K. pneumoniaeO8      | LAVGDISFQAKCIKTIREFKKGGVTILFVSHNMSDVERICDRVWVIENHRLREIGSAERI    |               | 237 |
| A. salmonicida       | LAVGDDAFQQRKCYARLKLQSQGVTTILLVSHAAGSVIELCDRAVLLDRGEVLLQGEPKAV   |               | 232 |
| Y. enterocoliticaO_3 | FGTGDAAFQEKAEKMRDWIAGSDIFVFASHDRSLIKKLCNRIFRLEHGLIYEESMDIL-     |               | 239 |
| E. coliK1            | TAVGDAKFKKCSDFDKIREKSHLIMVSHSERALKEYCDVAIYLNKEGQGFYKNVTEA       |               | 211 |
| E. coliK5            | TAVGDARFKEKCAQLFKERHKESFLMVSHSLNSLKEFCDVVAIVFKNSYIIGYYENVQSG    |               | 211 |
|                      | ..** *: * . : . . :..                                           |               |     |
|                      |                                                                 |               |     |
| P. aeruginosa        | MDYYNALLAEREGQTVRQEMLADGQVRTISGTGEAAILDVRMVDQRQRALEVVVEVQAVT    |               | 292 |
| E. coliO8            | MDYYNALLADKQNSIKQVEHNG-KTQTVSGTGEVTTISEVHLLDEQGNVTEFVSVGHRVS    |               | 291 |
| E. coliO9a           | TNRYLDELFGKPKDSATKSATAISSAGSESQMSLDEIEDVYHTRPGYRPEEYRWGQGA      |               | 291 |
| K. pneumoniaeO1      | IELYKQAMA-----                                                  |               | 246 |
| K. pneumoniaeO8      | IELYKQAMA-----                                                  |               | 246 |
| A. salmonicida       | VHNYHKLHMEGDERARFRYHLRQTGRGDSYISDESTSEPKIKSAPGILSVDLQFQSTVW     |               | 292 |
| Y. enterocoliticaO_3 | -----                                                           |               |     |
| E. coliK1            | IADYKKDL-----                                                   |               | 219 |
| E. coliK5            | IDEYKMYQDLIDIE-----                                             |               | 224 |
|                      |                                                                 |               |     |
| P. aeruginosa        | LEVEVEVRQDIERLILGFMIKDRLGQPMYGINTHRLDKALTDLKAGERITYRFAFDMRLG    |               | 352 |
| E. coliO8            | LQVNVVEVKDDIPELVVGYMIKDRLGQPIFGTNTYHLNQTTLTSLKKGKRSFLFSFDARLG   |               | 351 |
| E. coliO9a           | KIIDYHIQSAGVDFPPLSTGNQQTDFLMKVVFEYDFDCVVPGILIKTLDLGLFLYGTNSFL   |               | 351 |
| K. pneumoniaeO1      | -----                                                           |               |     |
| K. pneumoniaeO8      | -----                                                           |               |     |
| A. salmonicida       | YESKGAVLSDVHIESF-----                                           |               | 308 |
| Y. enterocoliticaO_3 | -----                                                           |               |     |
| E. coliK1            | -----                                                           |               |     |
| E. coliK5            | -----                                                           |               |     |
|                      |                                                                 |               |     |
| P. aeruginosa        | KGHYSVALSLRSLDRLDRNFWEWRDYGLVFHVINNRQEDFVGCSSLGAETHISRSGEAL     |               | 412 |
| E. coliO8            | VGSYSVAVALHTSSTHLGKNYEWDRDLAVVFNVNTEQQEFVGVSWLPPELEIS-----      |               | 404 |
| E. coliO9a           | ASEGRENISVSRGDVVRVFKFSLPVDLNSGDYLLSFGISAGNPQTDMTPLDRRYDSIILHV   |               | 411 |
| K. pneumoniaeO1      | -----                                                           |               |     |
| K. pneumoniaeO8      | -----                                                           |               |     |
| A. salmonicida       | -----                                                           |               |     |
| Y. enterocoliticaO_3 | -----                                                           |               |     |
| E. coliK1            | -----                                                           |               |     |
| E. coliK5            | -----                                                           |               |     |
|                      |                                                                 |               |     |
| P. aeruginosa        | DPTSAESTP-----                                                  |               | 421 |
| E. coliO8            | -----                                                           |               |     |
| E. coliO9a           | TKSMDFWGVIDLKSSFTSYQ                                            |               | 431 |
| K. pneumoniaeO1      | -----                                                           |               |     |
| K. pneumoniaeO8      | -----                                                           |               |     |
| A. salmonicida       | -----                                                           |               |     |
| Y. enterocoliticaO_3 | -----                                                           |               |     |
| E. coliK1            | -----                                                           |               |     |
| E. coliK5            | -----                                                           |               |     |

**FIGURE S1.** Amino acid alignment of Wzt of *Pseudomonas aeruginosa* with other bacterial ATP-binding proteins involved in PS export. Asterisks represent identical amino acids and periods represent similar amino acids. As seen, *Pseudomonas aeruginosa* Wzt N terminus contains the highly conserved ATP-binding motif consisting of sites Walker A and Walker B, and other motifs, while the C terminus shows significant sequence diversity of the PS binding domain. Alignments were performed by using the CLUSTAL program.<sup>1</sup>

## REFERENCES

1. M. A. Larkin, *et al.*, Clustal W and Clustal X version 2.0, *Bioinformatics*, 2007, **23**, 2947-2948.
